# Supplementary material
Source: HighWire-hosted journal article supplement (https://ejhp.bmj.com/content/ejhpharm-2016-001003)
Supplement: inline-supplementary-material-2 [file inline-supplementary-material-2.pdf]

## Appendix B: Table of all deprescribed and reduced medicines

| Patient No | Medicines deprescribed                                                                       | No. falls risk medicine deprescribed | Medicine dose reduced or held    | No.falls risk medicines reduced/held |
|------------|----------------------------------------------------------------------------------------------|--------------------------------------|----------------------------------|--------------------------------------|
| 1          | Domperidone<br>Tramadol                                                                      | 1                                    |                                  |                                      |
| 2          | Aspirin<br>Omeprazole                                                                        |                                      |                                  |                                      |
| 3          | Metoclopramide                                                                               |                                      |                                  |                                      |
| 4          | Furosemide<br>Fentanyl (step down to<br>Buprenorphine)                                       | 1                                    |                                  |                                      |
| 5          | Bendroflumethazide<br>Lercanidipine<br>Losartan (low BP)<br>Alendronate (Poor<br>swallowing) | 2                                    |                                  |                                      |
| 6          | Ramipril (hyperkalaemia)                                                                     | 1                                    |                                  |                                      |
| 7          |                                                                                              |                                      | Bisoprolol                       |                                      |
| 8          | Dalteparin                                                                                   |                                      |                                  |                                      |
| 9          | Bisoprolol<br>Digoxin (Bradycardia)                                                          |                                      |                                  |                                      |
| 10         | Buprenorphine                                                                                | 1                                    | Doxazosin                        | 1                                    |
| 11         | Methotrexate (NOAC<br>started)<br>Folic Acid                                                 |                                      |                                  |                                      |
| 12         | Buprenorphine<br>(drowsiness)<br>Laxatives changed                                           | 1                                    | Bisoprolol                       |                                      |
| 13         | Propranolol                                                                                  |                                      |                                  |                                      |
| 14         | Dabigatran (to<br>Rivaroxaban)                                                               |                                      |                                  |                                      |
| 15         | Lercanidipine<br>Lisinopril (hypotension)<br>Moxonidine                                      | 3                                    |                                  |                                      |
| 16         |                                                                                              |                                      | Ramipril                         | 1                                    |
| 17         | Tramadol                                                                                     | 1                                    |                                  |                                      |
| 18         | Nicorandil<br>Isosorbide mononitrate                                                         | 1                                    | Omeprazole                       |                                      |
| 19         | Ramipril (Low BP &<br>dizziness)                                                             | 1                                    |                                  |                                      |
| 20         | Rivaroxaban                                                                                  |                                      | Oral Iron held<br>(constipation) |                                      |
| 21         |                                                                                              |                                      | Bisoprolol held                  |                                      |
| 22         | Tolterodine (delirium)                                                                       | 1                                    |                                  |                                      |
| 23         | Losartan<br>Tramadol                                                                         | 2                                    | Propranolol                      |                                      |
| 24         | Amlodipine<br>Bendroflumethiazide (low<br>BP)                                                | 1                                    |                                  |                                      |
| 25         | Nitrofurantoin<br>Enoxaparin                                                                 |                                      |                                  |                                      |
| 26         | Amitriptyline<br>Isosorbide mononitrate<br>Pregabalin<br>Ranolazine (dizziness)              | 3                                    |                                  |                                      |

|        |                                                             |    |                          |   |
|--------|-------------------------------------------------------------|----|--------------------------|---|
| 27     | Co-codamol (to Codeine)<br>Furosemide<br>Potassium chloride |    |                          |   |
| 28     | Oxybutynin (falls)<br>Trimethoprim (resistance)             | 1  | Citalopram               |   |
| 29     | Diazepam rectal (to<br>Lorazepam tab)                       | 1  |                          |   |
| 30     | Co-amilofruse (postural<br>hypotension)                     |    | Ramipril                 | 1 |
| 31     | Rifaximin<br>Colesevelam                                    |    |                          |   |
| 32     | Vitamin D high dose (to<br>maintenance)                     |    |                          |   |
| 33     | Spironolactone (high<br>potassium)                          |    | Digoxin Bisoprolol       |   |
| 34     | Lisinopril (Hypotension)                                    | 1  | Furosemide<br>Bisoprolol |   |
| 35     |                                                             |    | Irbesartan held          | 1 |
| 36     | Metoprolol (to Bisoprolol)<br>Aspirin (on NOAC)             |    |                          |   |
| 37     | Cetirizine                                                  | 1  | Amlodipine held          | 1 |
| 38     | Laxatives changed<br>Zopiclone                              | 1  |                          |   |
| Totals | 59                                                          | 25 | 16                       | 5 |
